# Supplementary material
Source: PubMed Central journal article supplement (PMC3258573)
Supplement: NIHMS344071-supplement-01.pdf [file NIHMS344071-supplement-01.pdf]

## **Supplemental Information**

### **Classification of a *Haemophilus influenzae***

### **ABC Transporter HI1470/71 through Its Cognate**

### **Molybdate Periplasmic Binding Protein, MoIA**

Leidamarie Tirado-Lee, Allen Lee, Douglas C. Rees, and Heather W. Pinkett

### **Inventory of Supplemental Information**

**Figure S1 related to Figure 3A**

**Figure S2 related to Figure 3A**

**Figure S3 related to Figure 3B**

**Figure S4 related to Figure 6**

**Figure S5 related to Figure 2**

S.1.

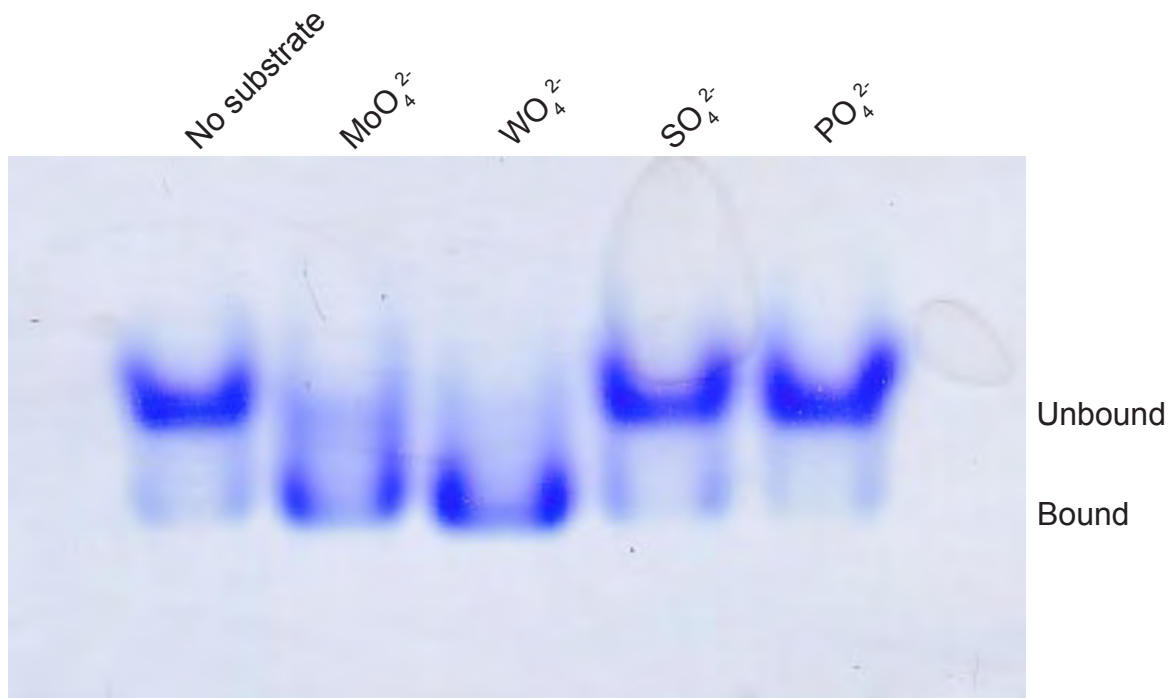

S.2.

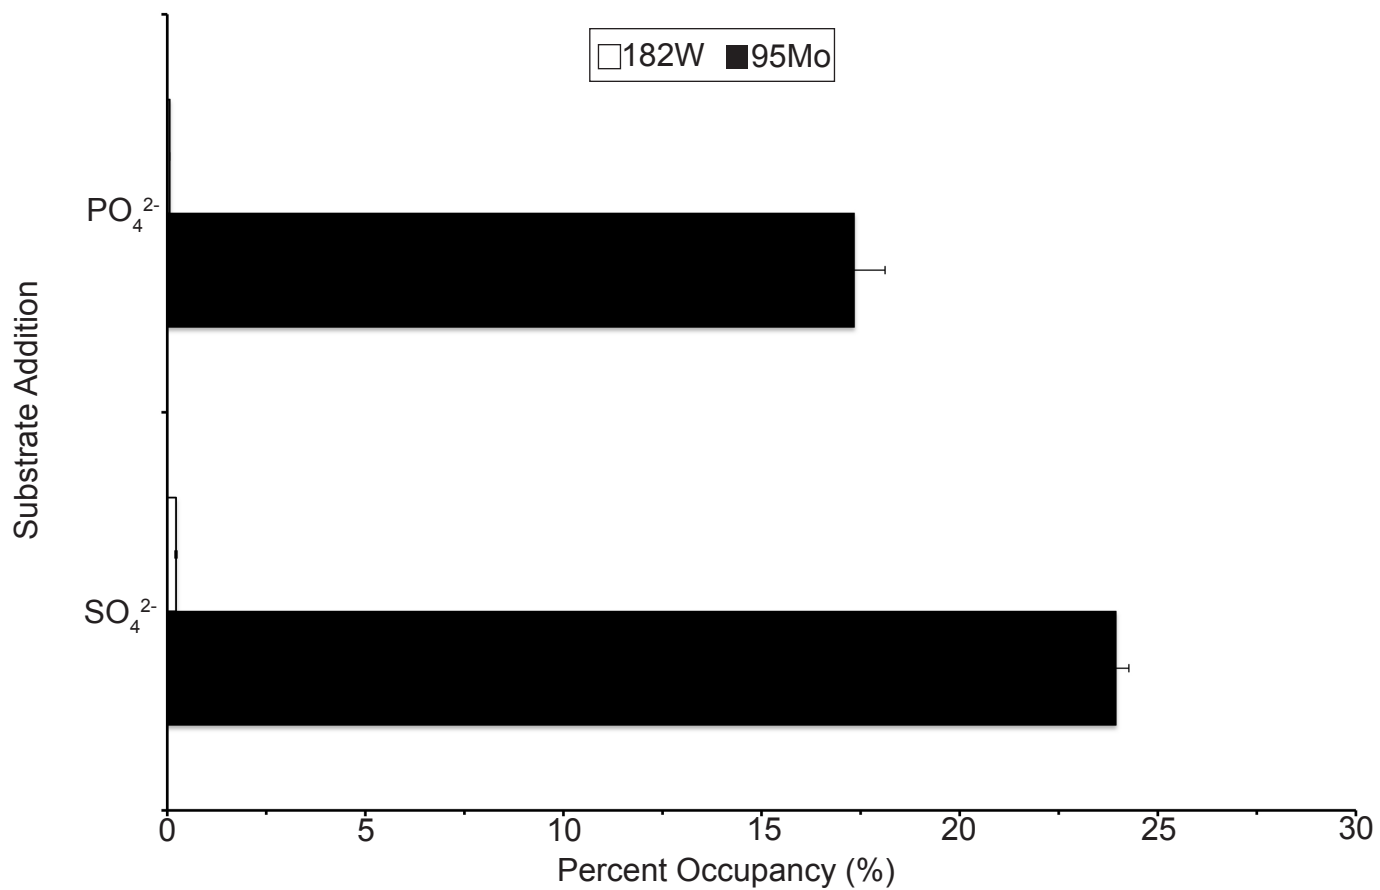

S.3.

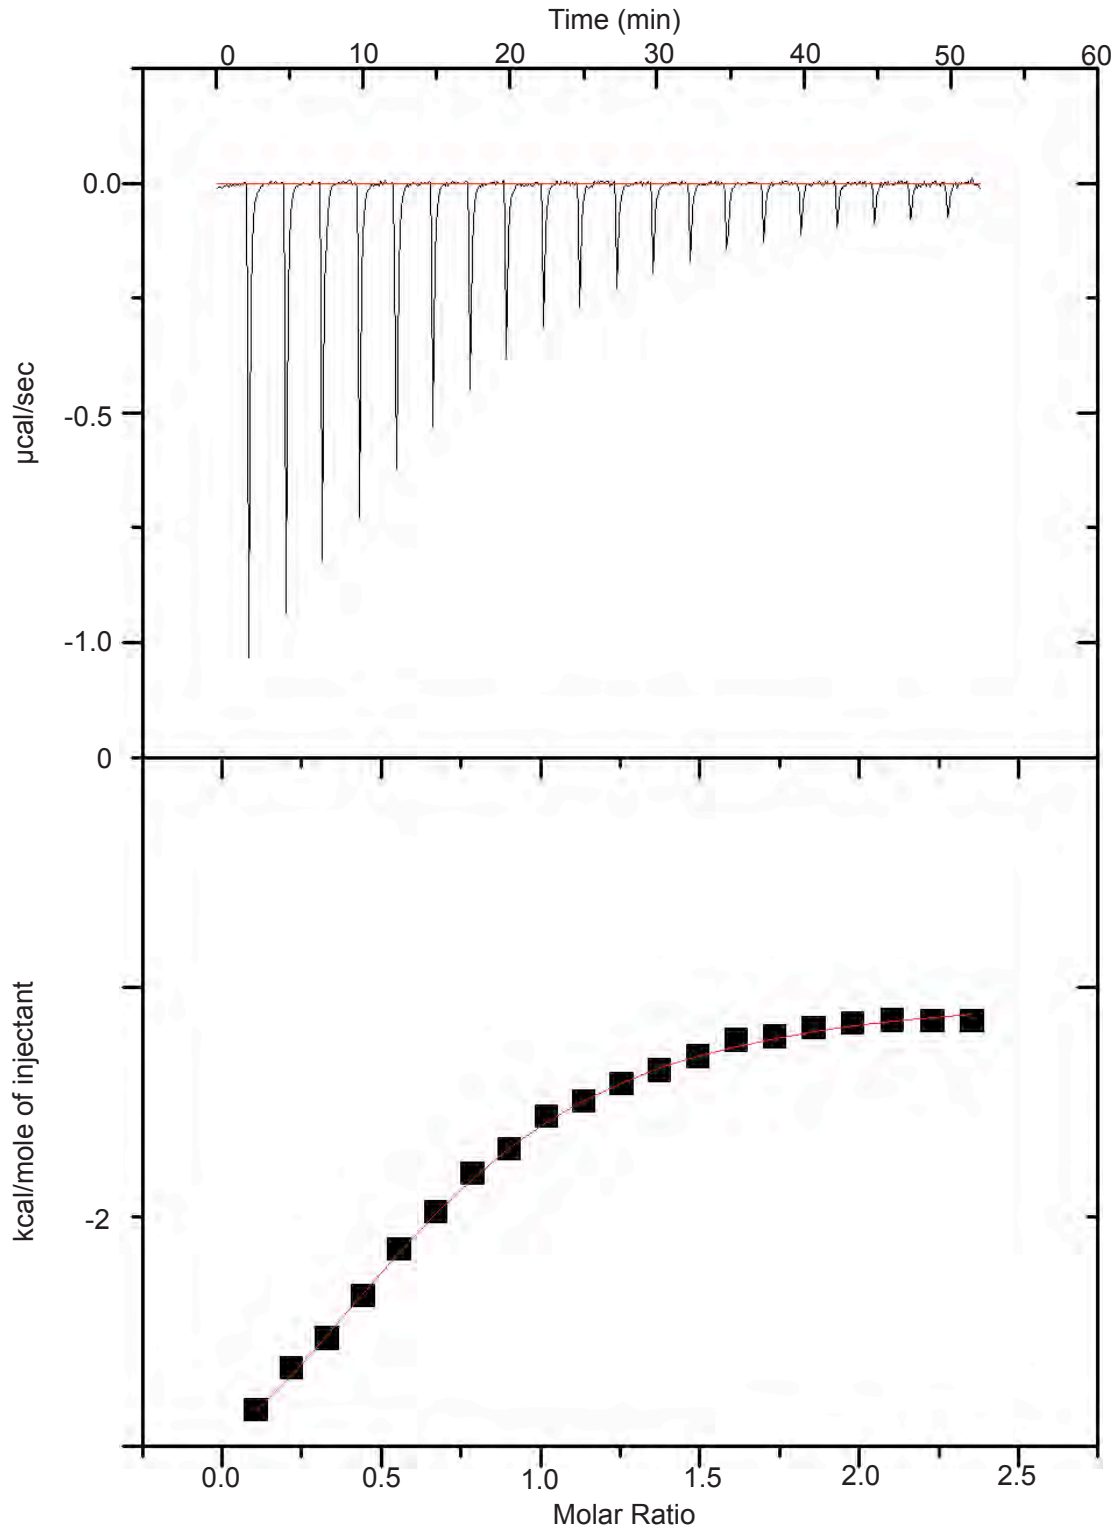

## S.4

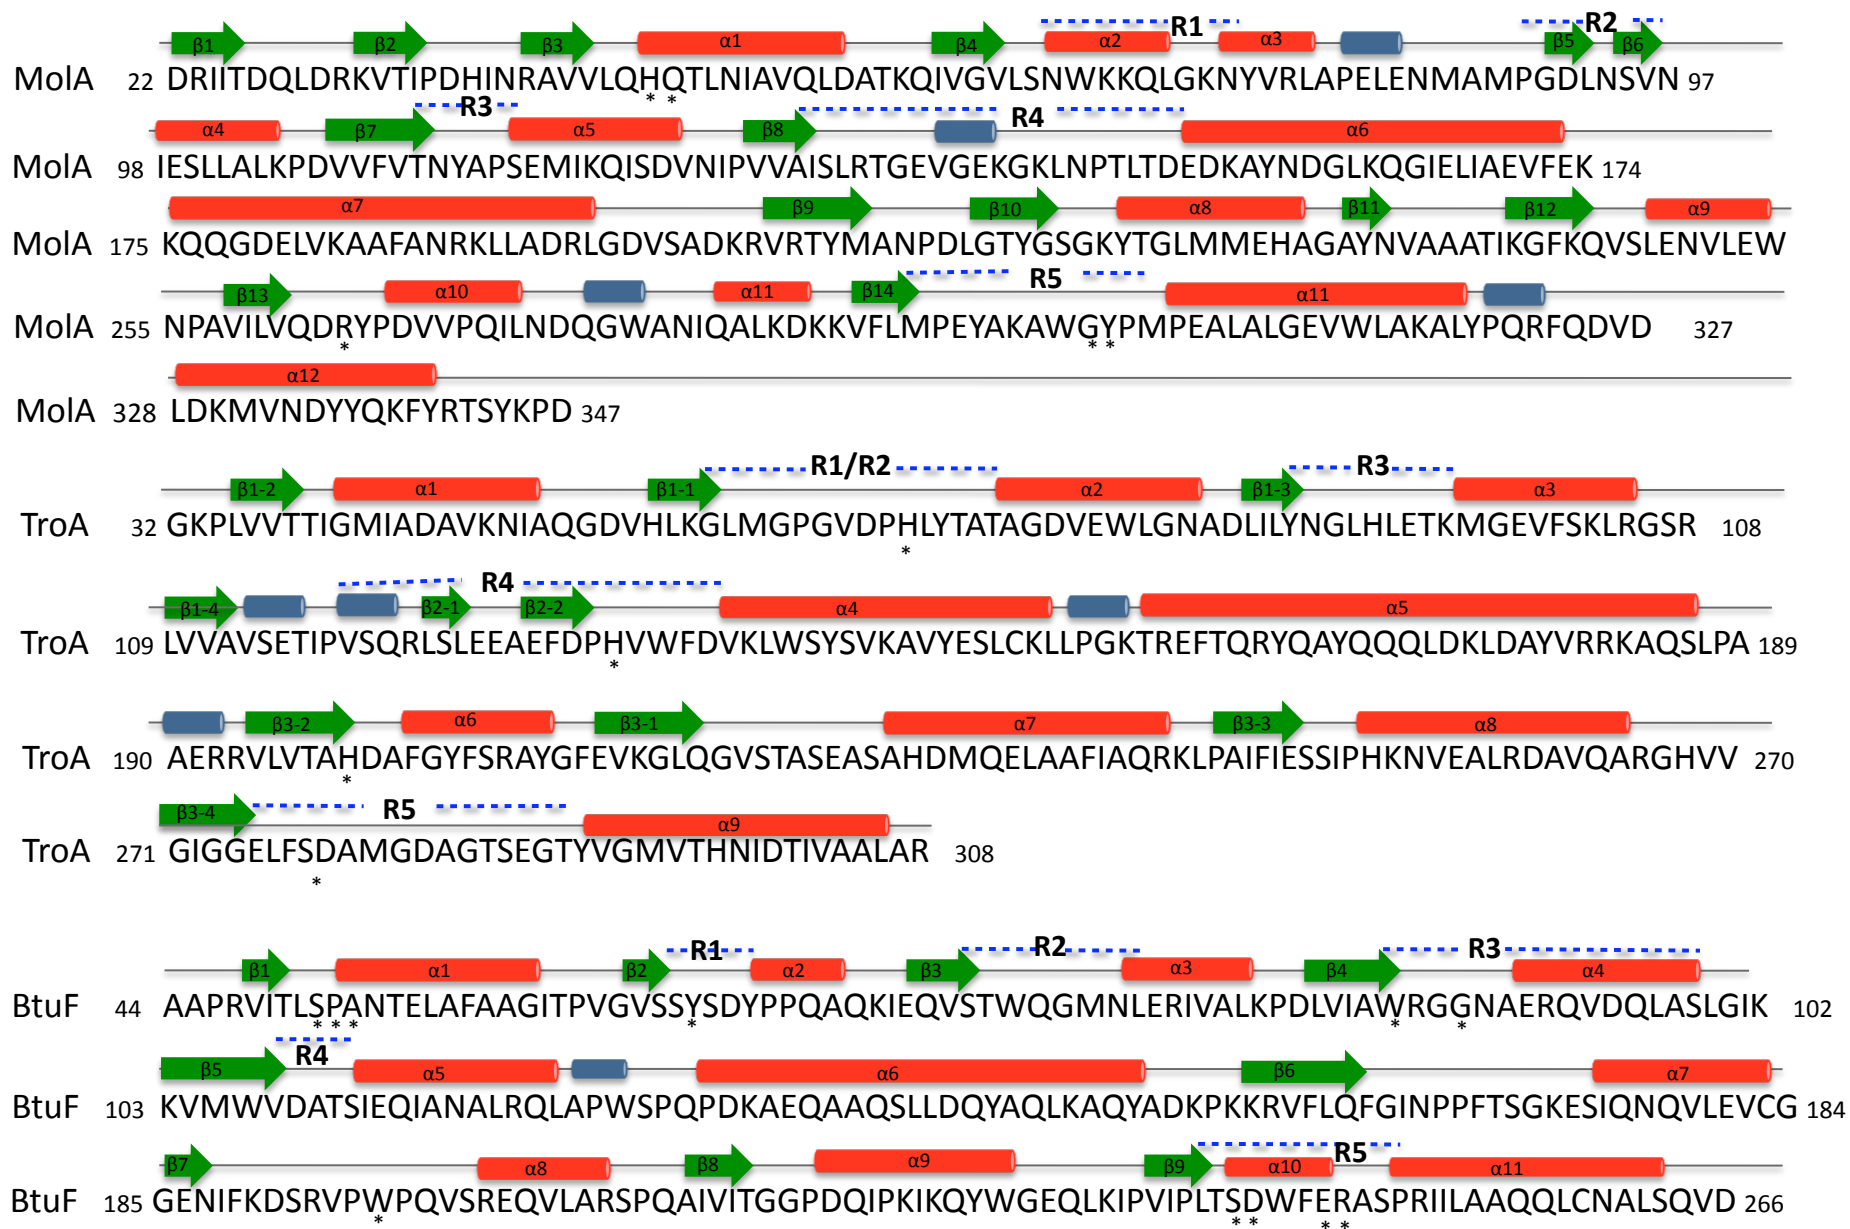



**Figure S1 related to Figure 3A.** Ligand-dependent mobility shift of HI1472. Protein was incubated with a 4000-fold molar excess of various oxyanions prior to running on a 12% native polyacrylamide gel. Molybdate and tungstate were the only oxoanions capable of causing a mobility shift.

**Figure S2 related to Figure 3A.** Metal content analysis of HI1472. ICP-MS quantitation of molybdenum and tungsten content of HI1472. Protein was expressed in sodium sulfate (SO) and sodium phosphate (PO). The molybdate and tungstate occupancy do not decrease significantly from that of HI1472 grown in LB alone indicating that these oxoanions are not competing with the contaminating molybdate and tungstate available in the media.

**Figure S3 related to Figure 3B.** Tungstate binding affinity to HI1472. ITC of tungstate into HI1472. Sodium tungstate at 4.5 mM was titrated into 0.3 mM HI1472 to give a final molar ratio of 2.25:1. At the given concentrations, the estimated  $K_d$  was 84  $\mu$ M. The Origin Software determined that a HI1472 concentration of 4 mM would be required to get an optimal binding curve.

**Figure S4 related to Figure 6.** Sequence and structural schematic of MolA, and structural homologs TroA and BtuF. Green arrows represent  $\beta$ -strands;  $\alpha$ -helices and  $3_{10}$  helices are represented by red and blue cylinders respectively (classification by DSSP)(1). The asterisks (\*) indicate residues that form bonds with the substrate. Blue dashed lines denote the loop regions in each structure that make up the inner cavity of the binding pocket of MolA, TroA and BtuF.

**Figure S5 related to Figure 2.** Schematic representations of the molybdate/tungstate-binding pockets from MolA-molybdate and MolA-tungstate produced using the program LIGPLOT(2). The hydrogen bonds are indicated by dashed lines and their lengths are shown in angstroms. Atoms are colored as follows: blue, nitrogen; red, oxygen; black, carbon; green, tungsten/molybdenum.

**References:**

1. Kabsch W, Sander C. How good are predictions of protein secondary structure? FEBS Lett. 1983 May 8;155(2):179-82.
2. Wallace AC, Laskowski RA, Thornton JM. LIGPLOT: a program to generate schematic diagrams of protein-ligand interactions. Protein Eng. 1995 Feb;8(2):127-34.
